# Supplementary material for: A plant biostimulant made from the marine brown algae Ascophyllum nodosum and chitosan reduce Fusarium head blight and mycotoxin contamination in wheat
Source: PLoS One. 2019 Sep 11;14(9):e0220562. doi: 10.1371/journal.pone.0220562 (PMC6738925; doi:10.1371/journal.pone.0220562)
Supplement: S1 Table — Each sheet contains data of one experiment, the title of experiment is presented in each of the sheets. (XLSX) [file pone.0220562.s001.xlsx]

## Sheet: PDA plate assay
	Control	100 PPM chitosan	LSE:A	LSE:C	LSE 5ml/L 100 PPM chitosan	LSE 15ml/L 100 PPM chitosan
	20.21	9.04	16.46	16.06	10.17	7.94
	15.64	8.91	15.67	16.02	10.04	11.3
	16.89	8.61	15.96	16	9.74	8.81
	17.51	9.98	16.66	16.14	11.11	9.64
	15.54	8.61	15.21	16.16	9.74	8.36
	18.36	9.36	16.64	14.6	10.49	9.98								Control	1	20.21
	13.81	8.54	15.69	16.03	9.39	8.61									1	15.64
	15.39	6.94	16.67	10.08	7.79	9.36									1	16.89
	11.54	10.3	16.63	15.11	11.15	9.33									1	17.51
	16.87	7.81	16.61	13.74	8.66	9.46									1	15.54
	11.31	8.64	16.64	17.14	9.49	6.94									1	18.36
	16.52	7.36	14.64	14.16	8.21	9.54									1	13.81
	15.51	9.61	13.51	14.14	10.44	7.94									1	15.39
	16.54	8.91	16.02	13.01	9.74	11.3									1	11.54
	18.52	7.36	15.61	15.52	8.19	8.81									1	16.87
	16.48	9.33	16.24	15.96	10.16	8.94									1	11.31
	17.81	9.46	17.64	15.17	10.29	9.74									1	16.52
	19.51	6.94	14.66	15.46	7.77	10.49									1	15.51
Average	16.3311	8.65056	15.9533	15.0278	9.58722	9.24944									1	16.54
SEM	0.558726	0.237225	0.230237	0.380229	0.249374	0.26487									1	18.52
															1	16.48
															1	17.81
															1	19.51
														Chitosan100 PPM	2	9.04
															2	8.91
															2	8.61
															2	9.98
										Control	17.2539	0.558726			2	8.61
										Chitosan100 PPM	8.65056	0.237225			2	9.36
										LSE 5ml/L	15.9533	0.930237			2	8.54
										LSE 15ml/L	15.0278	1.38023			2	6.94
										LSE 5ml/L+100 PPM chitosan	10.5872	0.249374			2	10.3
										LSE 15ml/L+100 PPM chitosan	10.9594	0.66487			2	7.81
															2	8.64
															2	7.36
															2	9.61
															2	8.91
															2	7.36
															2	9.33
															2	9.46
															2	6.94
														LSE 5ml/L	3	16.46
															3	15.67
															3	15.96
															3	16.66
															3	15.21
															3	16.64
															3	15.69
															3	16.67
															3	16.63
															3	16.61
															3	16.64
															3	14.64
															3	13.51
															3	16.02
															3	15.61
															3	16.24
															3	17.64
															3	14.66
														LSE 15ml/L	4	16.06
															4	16.02
															4	16
															4	16.14
															4	16.16
															4	14.6
															4	16.03
															4	10.08
															4	15.11
															4	13.74
															4	17.14
															4	14.16
															4	14.14
															4	13.01
															4	15.52
															4	15.96
															4	15.17
															4	15.46
														LSE 5ml/L+100 PPM chitosan	5	10.17
															5	10.04
															5	9.74
															5	11.11
															5	9.74
															5	10.49
															5	9.39
															5	7.79
															5	11.15
															5	8.66
															5	9.49
															5	8.21
															5	10.44
															5	9.74
															5	8.19
															5	10.16
															5	10.29
															5	7.77
														LSE 15ml/L+100 PPM chitosan	6	7.94
															6	11.3
															6	8.81
															6	9.64
															6	8.36
															6	9.98
															6	8.61
															6	9.36
															6	9.33
															6	9.46
															6	6.94
															6	9.54
															6	7.94
															6	11.3
															6	8.81
															6	8.94
															6	9.74
															6	10.49

## Sheet: Leaf detachment assay
		Control	Chi 100 PPM chitosan	LSE 5ml/L	LSE 15ml/L	LSE 5ml/L+Chi 100 PPM chitosan	LSE 15ml/L+Chi 100 PPM chitosan
		0.016	0.013	0.013	0.008	0.007	0.001
		0.015	0.01	0.011	0.01	0.002	0.007
		0.016	0.009	0.01	0.007	0.01	0.001			Control	1	0.016
		0.017	0.01	0.015	0.013	0.007	0.002				1	0.015
		0.015	0.0089	0.0089	0.01	0.009	0.003				1	0.016
		0.014	0.012	0.0112	0.009	0.008	0.002				1	0.017
	Avrg	0.0155	0.0104833	0.0115167	0.0095	0.00716667	0.00266667				1	0.015
	SEM	0.000428174	0.000678438	0.000891597	0.000846562	0.00113774	0.000918937				1	0.014
										Chi 100 PPM chitosan	2	0.013
											2	0.01
											2	0.009
		Avg	SEM								2	0.01
	Control	0.0155	0.000428174								2	0.0089
	Chi 100 PPM chitosan	0.0104833	0.000678438								2	0.012
	LSE 5ml/L	0.0115167	0.000891597							LSE 5ml/L	3	0.013
	LSE 15ml/L	0.0095	0.000846562								3	0.011
	LSE 5ml/L+Chi 100 PPM chitosan	0.00716667	0.00113774								3	0.01
	LSE 15ml/L+Chi 100 PPM chitosan	0.00266667	0.000918937								3	0.015
											3	0.0089
											3	0.0112
										LSE 15ml/L	4	0.008
											4	0.01
											4	0.007
											4	0.013
											4	0.01
											4	0.009
										LSE 5ml/L+Chi 100 PPM chitosan	5	0.007
											5	0.002
											5	0.01
											5	0.007
											5	0.009
											5	0.008
										LSE 15ml/L+Chi 100 PPM chitosan	6	0.001
											6	0.007
											6	0.001
											6	0.002
											6	0.003
											6	0.002

## Sheet: PR1 Gene expression
						0											a
				GAPDH	PR1	dCT	ddct	2^-ddct	average	SEM					2^-ddct
	24 hrs post Fusarium application	control T20	1	25.7547	32.6499	6.89523	0.00248	0.998282	0.911516	0.0492928			control T20	1	0.998282
			1	25.7559	32.6487	6.89275	0	1						1	1
			1	25.757	32.6476	6.89055	-0.0022	1.00153						1	1.00153
			1	24.8974	32.1519	7.25451	0.361758	0.778216						1	0.778216
			1	24.8986	32.1506	7.25203	0.359278	0.779555						1	0.779555
			1	24.8997	32.1495	7.24983	0.357078	0.780744						1	0.780744
		control FG	2	24.2574	29.1575	4.90005	-1.9927	3.97981	3.73745	0.244528			control FG	2	3.97981
			2	24.2598	29.1562	4.89647	-1.99628	3.9897						2	3.9897
			2	24.2587	29.1551	4.89647	-1.99628	3.9897						2	3.9897
			2	23.9022	29.1742	5.272	-1.62075	3.07535						2	3.07535
			2	24.0263	29.0501	5.0238	-1.86895	3.65267						2	3.65267
			2	24.1189	29.6575	5.5386	-1.35415	2.55647						2	2.55647
		LSE A FG	3	25.4323	29.4715	4.03925	-2.8535	7.22753	13.0724	2.8486			LSE A FG	3	7.22753
			3	25.4937	29.4101	3.91639	-2.97636	7.86999						3	7.86999
			3	25.598	29.3058	3.70775	-3.18499	9.0945						3	9.0945
			3	24.6663	27.208	2.54169	-4.35106	20.408						3	20.408
			3	24.6787	27.1956	2.51689	-4.37586	20.7618						3	20.7618
			3	24.6897	27.1846	2.49489	-4.39786	21.0809						3	21.0809
		LSE C FG	4	24.9476	29.6829	4.73526	-2.15749	4.46138	4.58929	0.484827			LSE C FG	4	4.46138
			4	25.1129	29.5176	4.4047	-2.48805	5.61019						4	5.61019
			4	25.1663	29.4643	4.29799	-2.59476	6.04088						4	6.04088
			4	24.596	29.9664	5.37047	-1.52228	2.87245						4	2.87245
			4	24.8279	29.7345	4.90667	-1.98607	3.96157						4	3.96157
			4	24.7942	29.7682	4.97397	-1.91877	3.78102						4	3.78102
		100 PPM Chitosan FG	5	24.5423	28.8911	4.3488	-2.54394	5.83181	6.19042	0.670232			100 PPM Chitosan FG	5	5.83181
			5	24.7742	28.6592	3.88501	-3.00774	8.04301						5	8.04301
			5	24.7405	28.6929	3.95231	-2.94044	7.67643						5	7.67643
			5	23.5497	28.3389	4.78928	-2.10347	4.2974						5	4.2974
			5	23.6737	28.2149	4.54128	-2.35147	5.10342						5	5.10342
			5	23.552	28.3366	4.7846	-2.10815	4.31137						5	4.31137
		LSE A+Chitosan FG	6	24.4676	28.9335	4.46594	-2.42681	5.37702	12.1651	3.89678			LSE A+Chitosan FG	6	5.37702
			6	24.48	28.9211	4.44114	-2.45161	5.47025						6	5.47025
			6	24.6918	28.7093	4.01756	-2.87519	7.33701						6	7.33701
			6	24.1579	26.7659	2.608	-4.28475	19.4912						6	19.4912
			6	24.282	26.6418	2.3598	-4.53295	23.1501						6	23.1501
			6	24.3746	26.5492	2.1746	-4.71815	26.3211						6	26.3211
		LSE C+Chitosan FG	7	24.7879	27.0859	2.29794	-4.59481	24.1643	28.5114	2.25423			LSE C+Chitosan FG	7	24.1643
			7	25.0411	26.8327	1.79156	-5.10119	34.325						7	34.325
			7	24.9678	26.906	1.93829	-4.95446	31.0056						7	31.0056
			7	25.6286	27.9211	2.29246	-4.60029	24.2563						7	24.2563
			7	25.7526	27.7971	2.04446	-4.84829	28.8058						7	28.8058
			7	25.9528	27.5969	1.64407	-5.24867	38.0196						7	38.0196
						0	-6.89275	118.829							118.829
	48 hrs post Fusarium application	control FG	8	23.3686	27.8406	4.47202	-2.42073	5.35441	7.2628	0.52983			control FG	8	5.35441
			8	23.6928	27.5164	3.82363	-3.06911	8.39257						8	8.39257
			8	23.5928	27.6164	4.02363	-2.86911	7.30616						8	7.30616
			8	23.1547	27.2452	4.09045	-2.8023	6.9755						8	6.9755
			8	23.2789	27.1211	3.84218	-3.05057	8.28538						8	8.28538
			8	23.3346	27.0654	3.7308	-3.16195	8.95036						8	8.95036
		LSE A FG	9	24.1424	27.2445	3.10208	-3.79066	13.839	13.9564	2.25776			LSE A FG	9	13.839
			9	24.3349	27.0521	2.71721	-4.17553	18.0701						9	18.0701
			9	24.4649	26.9221	2.45724	-4.4355	21.6381						9	21.6381
			9	23.6403	27.7734	4.13318	-2.75957	6.77193						9	6.77193
			9	23.8816	27.5321	3.65047	-3.24228	9.46288						9	9.46288
			9	24.0201	27.3936	3.37353	-3.51922	11.4654						9	11.4654
		LSE C FG	10	23.5606	27.8793	4.31865	-2.5741	5.95498	11.7415	3.39853			LSE C FG	10	5.95498
			10	23.6848	27.7551	4.07038	-2.82237	7.07322						10	7.07322
			10	23.7405	27.6995	3.959	-2.93375	7.64092						10	7.64092
			10	23.5648	26.451	2.88621	-4.00653	16.0726						10	16.0726
			10	23.7901	26.2257	2.43558	-4.45717	21.9656						10	21.9656
			10	23.8894	26.1264	2.23695	-4.6558	25.2078						10	25.2078
		100 PPM Chitosan FG	11	25.9289	28.8302	2.90131	-3.99144	15.9053	23.3435	3.40273			100 PPM Chitosan FG	11	15.9053
			11	26.0542	28.7048	2.65067	-4.24208	18.9231						11	18.9231
			11	26.1268	28.6322	2.50535	-4.3874	20.9286						11	20.9286
			11	25.8289	28.1519	2.32302	-4.56972	23.7478						11	23.7478
			11	26.1529	27.8279	1.67502	-5.21772	37.2127						11	37.2127
			11	26.0613	27.9195	1.85819	-5.03456	32.7759						11	32.7759
		LSE A+Chitosan FG	12	23.9199	27.3221	3.40214	-3.49061	11.2403	28.1928	8.02298			LSE A+Chitosan FG	12	11.2403
			12	24.2518	26.9902	2.73834	-4.1544	17.8074						12	17.8074
			12	24.2398	27.0022	2.76249	-4.13026	17.5119						12	17.5119
			12	23.6855	25.2774	1.59184	-5.30091	39.4215						12	39.4215
			12	23.9255	25.0374	1.11184	-5.78091	54.9829						12	54.9829
			12	23.9195	25.0434	1.12384	-5.76891	54.5274						12	54.5274
		LSE C+Chitosan FG	13	24.2601	25.1378	0.877755	-6.01499	64.6686	63.459	10.1963			LSE C+Chitosan FG	13	64.6686
			13	24.5014	24.8965	0.395043	-6.4977	90.3658						13	90.3658
			13	24.478	24.9198	0.44179	-6.45096	87.4846						13	87.4846
			13	23.5449	25.3439	1.799	-5.09375	34.1484						13	34.1484
			13	23.6702	25.2186	1.54836	-5.34438	40.6275						13	40.6275
			13	23.6695	25.2192	1.54974	-5.34301	40.5888						13	40.5888
						0	-6.89275	118.829							118.829
	48 hrs post Fusarium application	control FG	14	24.3828	31.4903	7.10752	0.214768	0.861685	1.53611	0.283472			control FG	14	0.861685
			14	24.6219	31.2511	6.6292	-0.263547	1.20043						14	1.20043
			14	24.5984	31.2746	6.67623	-0.216518	1.16193						14	1.16193
			14	25.2906	31.1562	5.86566	-1.02709	2.03791						14	2.03791
			14	25.4141	31.0327	5.61857	-1.27417	2.4186						14	2.4186
			14	25.4188	31.028	5.60914	-1.28361	2.43447						14	2.43447
		LSE A FG	15	25.6739	31.8026	6.12873	-0.764019	1.69821	2.1721	0.20201			LSE A FG	15	1.69821
			15	25.7761	31.7004	5.92425	-0.968501	1.95681						15	1.95681
			15	25.8841	31.5924	5.70829	-1.18445	2.27277						15	2.27277
			15	25.2906	31.1562	5.86566	-1.02709	2.03791						15	2.03791
			15	25.5437	30.903	5.35928	-1.53347	2.89481						15	2.89481
			15	25.5369	30.9099	5.373	-1.51974	2.8674						15	2.8674
		LSE C FG	16	24.5359	29.7602	5.22429	-1.66845	3.17874	3.08201	0.490686			LSE C FG	16	3.17874
			16	24.7713	29.5248	4.75347	-2.13928	4.40541						16	4.40541
			16	24.7385	29.5576	4.81914	-2.07361	4.20939						16	4.20939
			16	24.026	30.3057	6.27967	-0.613077	1.52952						16	1.52952
			16	24.2502	30.0815	5.83132	-1.06142	2.08699						16	2.08699
			16	24.2573	30.0744	5.81711	-1.07564	2.10765						16	2.10765
		100 PPM Chitosan FG	17	24.5156	30.5405	6.02489	-0.867857	1.82495	7.18353	2.9233			100 PPM Chitosan FG	17	1.82495
			17	24.843	30.2131	5.37006	-1.52268	2.87325						17	2.87325
			17	24.7474	30.3087	5.56129	-1.33145	2.51656						17	2.51656
			17	28.3405	31.6524	3.31198	-3.58076	11.9651						17	11.9651
			17	28.5826	31.4103	2.82771	-4.06504	16.7378						17	16.7378
			17	28.5746	31.4183	2.84376	-4.04898	16.5526						17	16.5526
		LSE A+Chitosan FG	18	23.6855	26.2774	2.59184	-4.30091	19.7107	22.8633	1.61677			LSE A+Chitosan FG	18	19.7107
			18	23.9109	26.052	2.14101	-4.75173	26.941						18	26.941
			18	23.9138	26.0491	2.13532	-4.75743	27.0476						18	27.0476
			18	23.5449	26.3439	2.799	-4.09375	17.0742						18	17.0742
			18	23.7766	26.1121	2.33552	-4.55723	23.543						18	23.543
			18	23.7762	26.1126	2.33644	-4.55631	23.528						18	23.528
		LSE C+Chitosan FG	19	24.2601	26.1378	1.87775	-5.01499	32.3343	33.9486	4.11229			LSE C+Chitosan FG	19	32.3343
			19	24.5017	25.8962	1.39453	-5.49822	45.199						19	45.199
			19	24.4912	25.9067	1.41551	-5.47724	44.5465						19	44.5465
			19	24.304	26.8503	2.54631	-4.34644	20.3427						19	20.3427
			19	24.5167	26.6375	2.12082	-4.77192	27.3207						19	27.3207
			19	24.5163	26.6379	2.12167	-4.77108	27.3047						19	27.3047
				average	SEM
		24 hrs	control:T20	0.911516	0.0492928
			control:Fg	3.73745	0.244528
			100 PPM Chitosan:Fg	13.0724	2.8486
			LSE 5ml/L: Fg	4.58929	0.484827
			LSE 15ml/L: Fg	6.19042	0.670232
			LSE 5ml/L+Chitosan:Fg	12.1651	3.89678
			LSE 15ml/L+Chitosan:Fg	28.5114	2.25423
		48 hrs	control:Fg	7.2628	0.52983
			100 PPM Chitosan:Fg	13.9564	2.25776
			LSE 5ml/L: Fg	11.7415	3.39853
			LSE 15ml/L: Fg	23.3435	3.40273
			LSE 5ml/L+Chitosan:Fg	28.1928	8.02298
			LSE 15ml/L+Chitosan:Fg	63.459	10.1963
		72 hrs	control:Fg	1.53611	0.283472
			100 PPM Chitosan:Fg	2.1721	0.20201
			LSE 5ml/L: Fg	3.08201	0.490686
			LSE 15ml/L: Fg	7.18353	2.9233
			LSE 5ml/L+Chitosan:Fg	22.8633	1.61677
			LSE 15ml/L+Chitosan:Fg	33.9486	4.11229

## Sheet: PR2 Gene expression
				GAPDH	PR2	dCT	ddct	2^-ddct	average	SEM
	24 hrs post Fusarium application	1	control T20	25.7547	36.9265	11.1718	0.00468	0.996761	0.815194	0.0819395				1	control T20	0.996761
		1		25.7559	36.9252	11.1693	0.0022	0.998476						1		0.998476
		1		25.757	36.9241	11.1671	-4.79616e-14	1						1		1
		1		24.8974	36.7289	11.8316	0.664449	0.63093						1		0.63093
		1		24.8986	36.7277	11.8291	0.661969	0.632015						1		0.632015
		1		24.8997	36.7266	11.8269	0.659769	0.63298						1		0.63298
		2	control FG	24.2574	29.9193	5.66187	-5.50525	45.4199	54.1385	4.55529				2	control FG	45.4199
		2		24.2598	29.9169	5.65719	-5.50993	45.5675						2		45.5675
		2		24.2587	29.918	5.65939	-5.50773	45.4981						2		45.4981
		2		23.9022	29.3351	5.43287	-5.73425	53.2329						2		53.2329
		2		24.0263	29.211	5.18467	-5.98245	63.226						2		63.226
		2		24.1189	29.1184	4.99947	-6.16765	71.8863						2		71.8863
		3	LSE A FG	25.4323	29.1723	3.73998	-7.42714	172.104	133.8	26.6846				3	LSE A FG	172.104
		3		25.4937	29.1108	3.61712	-7.55	187.402						3		187.402
		3		25.598	29.0065	3.40849	-7.75863	216.561						3		216.561
		3		24.6663	29.6175	4.95121	-6.21591	74.332						3		74.332
		3		24.6787	29.6051	4.92641	-6.24071	75.6208						3		75.6208
		3		24.6897	29.5941	4.90441	-6.26271	76.7828						3		76.7828
		4	LSE C FG	24.9476	29.8467	4.89903	-6.26809	77.0693	179.728	40.6731				4	LSE C FG	77.0693
		4		25.1129	29.6814	4.56848	-6.59864	96.9147						4		96.9147
		4		25.1663	29.628	4.46176	-6.70535	104.355						4		104.355
		4		24.596	28.0049	3.40896	-7.75816	216.49						4		216.49
		4		24.8279	27.773	2.94517	-8.22195	298.575						4		298.575
		4		24.7942	27.8067	3.01247	-8.15465	284.967						4		284.967
		5	100 PPM Chitosan FG	24.5423	28.4398	3.89746	-7.26966	154.307	143.893	22.3306				5	100 PPM Chitosan FG	154.307
		5		24.7742	28.2079	3.43367	-7.73345	212.814						5		212.814
		5		24.7405	28.2415	3.50097	-7.66615	203.115						5		203.115
		5		23.5497	28.1953	4.64568	-6.52144	91.8647						5		91.8647
		5		23.6737	28.0713	4.39768	-6.76944	109.095						5		109.095
		5		23.552	28.193	4.641	-6.52612	92.1632						5		92.1632
		6	LSE A+Chitosan FG	24.4676	27.1508	2.68318	-8.48394	358.031	356.699	30.7044				6	LSE A+Chitosan FG	358.031
		6		24.48	27.1384	2.65838	-8.50874	364.238						6		364.238
		6		24.6918	26.9266	2.2348	-8.93232	488.537						6		488.537
		6		24.1579	27.2878	3.12997	-8.03715	262.678						6		262.678
		6		24.282	27.1637	2.88177	-8.28535	311.989						6		311.989
		6		24.3746	27.0711	2.69657	-8.47055	354.723						6		354.723
		7	LSE C+Chitosan FG	24.7879	28.3067	3.51878	-7.64834	200.622	293.784	30.9747				7	LSE C+Chitosan FG	200.622
		7		25.0411	28.0535	3.0124	-8.15471	284.98						7		284.98
		7		24.9678	28.1269	3.15913	-8.00798	257.421						7		257.421
		7		25.6286	28.7106	3.08201	-8.0851	271.556						7		271.556
		7		25.7526	28.5866	2.83401	-8.3331	322.489						7		322.489
		7		25.9528	28.3864	2.43363	-8.73349	425.64						7		425.64
						0	-11.1671	2299.52								2299.52
	48 hrs post Fusarium application	8	control FG	26.3686	30.1561	3.78755	-7.37957	166.522	192.184	17.8112				8	control FG	166.522
		8		26.6928	29.832	3.13916	-8.02796	261.009						8		261.009
		8		26.5928	29.932	3.33916	-7.82796	227.222						8		227.222
		8		26.1547	30.1561	4.00141	-7.16571	143.58						8		143.58
		8		26.2789	30.032	3.75314	-7.41398	170.541						8		170.541
		8		26.3346	29.9763	3.64176	-7.52536	184.229						8		184.229
		9	LSE A FG	24.1424	27.2069	3.06445	-8.10267	274.882	286.362	39.2032				9	LSE A FG	274.882
		9		24.3349	27.0145	2.67958	-8.48754	358.925						9		358.925
		9		24.4649	26.8845	2.41961	-8.74751	429.795						9		429.795
		9		23.6403	27.4852	3.84497	-7.32215	160.025						9		160.025
		9		23.8816	27.2439	3.36225	-7.80486	223.614						9		223.614
		9		24.0201	27.1054	3.08532	-8.0818	270.935						9		270.935
		10	LSE C FG	25.5606	28.2829	2.72231	-8.44481	348.45	465.449	42.9				10	LSE C FG	348.45
		10		25.6848	28.1588	2.47404	-8.69308	413.883						10		413.883
		10		25.7405	28.1031	2.36266	-8.80446	447.101						10		447.101
		10		25.5648	28.0796	2.5148	-8.65232	402.352						10		402.352
		10		25.7901	27.8543	2.06417	-9.10295	549.873						10		549.873
		10		25.8894	27.7549	1.86554	-9.30158	631.037						10		631.037
		11	100 PPM Chitosan FG	25.9289	28.4133	2.4844	-8.68272	410.921	514.892	38.6892				11	100 PPM Chitosan FG	410.921
		11		26.0542	28.2879	2.23376	-8.93335	488.886						11		488.886
		11		26.1268	28.2153	2.08844	-9.07868	540.699						11		540.699
		11		25.8289	28.2895	2.46069	-8.70643	417.73						11		417.73
		11		26.1529	27.9655	1.81269	-9.35443	654.581						11		654.581
		11		26.0613	28.0571	1.99585	-9.17127	576.536						11		576.536
		12	LSE A+Chitosan FG	23.9199	25.9998	2.07988	-9.08724	543.916	688.753	61.2806				12	LSE A+Chitosan FG	543.916
		12		24.2518	25.6679	1.41609	-9.75103	861.695						12		861.695
		12		24.2398	25.68	1.44023	-9.72689	847.395						12		847.395
		12		23.6855	25.8941	2.20858	-8.95854	497.496						12		497.496
		12		23.9255	25.6541	1.72858	-9.43854	693.88						12		693.88
		12		23.9195	25.6601	1.74058	-9.42654	688.132						12		688.132
		13	LSE C+Chitosan FG	25.2601	27.0199	1.75988	-9.40724	678.986	663.464	92.0219				13	LSE C+Chitosan FG	678.986
		13		25.5014	26.7786	1.27717	-9.88995	948.794						13		948.794
		13		25.478	26.802	1.32392	-9.8432	918.543						13		918.543
		13		25.5449	27.982	2.43714	-8.72998	424.605						13		424.605
		13		25.6702	27.8567	2.1865	-8.98062	505.167						13		505.167
		13		25.6695	27.8574	2.18787	-8.97924	504.687						13		504.687
						0	-11.1671	2299.52								2299.52
	72 hrs post Fusarium application	14	control FG	24.3828	28.9244	4.54168	-6.62544	98.7318	118.533	6.52767				14	control FG	98.7318
		14		24.6219	28.6853	4.06336	-7.10376	137.545						14		137.545
		14		24.5984	28.7088	4.11039	-7.05673	133.133						14		133.133
		14		25.2906	29.7983	4.50779	-6.65933	101.078						14		101.078
		14		25.4141	29.6748	4.26071	-6.90641	119.96						14		119.96
		14		25.4188	29.6701	4.25127	-6.91585	120.747						14		120.747
		15	LSE A FG	25.6739	29.102	3.42813	-7.73899	213.633	188.765	29.0101				15	LSE A FG	213.633
		15		25.7761	28.9998	3.22364	-7.94347	246.164						15		246.164
		15		25.8841	28.8918	3.00769	-8.15943	285.912						15		285.912
		15		25.2906	29.7983	4.50779	-6.65933	101.078						15		101.078
		15		25.5437	29.5452	4.00141	-7.16571	143.58						15		143.58
		15		25.5369	29.552	4.01514	-7.15198	142.22						15		142.22
		16	LSE C FG	24.5359	28.6679	4.13196	-7.03516	131.158	133.353	15.4039				16	LSE C FG	131.158
		16		24.7713	28.4324	3.66114	-7.50598	181.772						16		181.772
		16		24.7385	28.4653	3.7268	-7.44032	173.684						16		173.684
		16		24.026	28.8048	4.77877	-6.38835	83.7694						16		83.7694
		16		24.2502	28.5806	4.33042	-6.8367	114.301						16		114.301
		16		24.2573	28.5735	4.31621	-6.85091	115.433						16		115.433
		17	100 PPM Chitosan FG	24.5156	31.0571	6.54149	-4.62563	24.6861	203.971	78.6356				17	100 PPM Chitosan FG	24.6861
		17		24.843	30.7297	5.88667	-5.28045	38.8664						17		38.8664
		17		24.7474	30.8253	6.0779	-5.08922	34.0415						17		34.0415
		17		28.3405	31.2895	2.94909	-8.21803	297.765						17		297.765
		17		28.5826	31.0474	2.46482	-8.7023	416.537						17		416.537
		17		28.5746	31.0554	2.48087	-8.68625	411.928						17		411.928
		18	LSE A+Chitosan FG	26.6855	28.8941	2.20858	-8.95854	497.496	442.958	84.6588				18	LSE A+Chitosan FG	497.496
		18		26.9109	28.6687	1.75775	-9.40937	679.988						18		679.988
		18		26.9138	28.6659	1.75206	-9.41506	682.677						18		682.677
		18		26.5449	29.982	3.43714	-7.72998	212.303						18		212.303
		18		26.7766	29.7503	2.97366	-8.19346	292.737						18		292.737
		18		26.7762	29.7507	2.97458	-8.19254	292.55						18		292.55
		19	LSE C+Chitosan FG	26.2601	29.0199	2.75988	-8.40724	339.493	372.909	33.9428				19	LSE C+Chitosan FG	339.493
		19		26.5017	28.7783	2.27666	-8.89046	474.566						19		474.566
		19		26.4912	28.7888	2.29763	-8.86949	467.716						19		467.716
		19		26.304	29.4525	3.1485	-8.01862	259.325						19		259.325
		19		26.5167	29.2397	2.72302	-8.4441	348.28						19		348.28
		19		26.5163	29.2401	2.72386	-8.44326	348.075						19		348.075
						average	SEM
				24 hrs	control:T20	0.815194	0.0819395
					control:Fg	54.1385	4.55529
					100 PPM Chitosan:Fg	133.8	26.6846
					LSE 5ml/L: Fg	179.728	40.6731
					LSE 15ml/L: Fg	143.893	22.3306
					LSE 5ml/L+Chitosan:Fg	356.699	30.7044
					LSE 15ml/L+Chitosan:Fg	293.784	30.9747
				48 hrs	control:Fg	192.184	17.8112
					100 PPM Chitosan:Fg	286.362	39.2032
					LSE 5ml/L: Fg	465.449	42.9
					LSE 15ml/L: Fg	514.892	38.6892
					LSE 5ml/L+Chitosan:Fg	688.753	61.2806
					LSE 15ml/L+Chitosan:Fg	663.464	92.0219
				72 hrs	control:Fg	118.533	6.52767
					100 PPM Chitosan:Fg	188.765	29.0101
					LSE 5ml/L: Fg	133.353	15.4039
					LSE 15ml/L: Fg	203.971	78.6356
					LSE 5ml/L+Chitosan:Fg	442.958	84.6588
					LSE 15ml/L+Chitosan:Fg	372.909	33.9428

## Sheet: Glu 2 Gene expression
				GAPDH	Glu2	dCT	ddct	2^-ddct	average	SEM
	24 hrs post Fusarium application	control T20	1	25.2537	24.9476	-0.306116	0.248225	0.841932	0.969691	0.0412245			control T20	1	0.841932
			1	25.3778	24.8235	-0.554341	0	1						1	1
			1	25.477	24.7243	-0.752741	-0.1984	1.14743						1	1.14743
			1	25.3678	24.9006	-0.467175	0.0871665	0.94137						1	0.94137
			1	25.3691	24.8994	-0.469655	0.0846865	0.942989						1	0.942989
			1	25.3702	24.8983	-0.471855	0.0824865	0.944428						1	0.944428
		control FG	2	24.2648	22.2861	-1.97866	-1.42432	2.68388	2.33129	0.176753			control FG	2	2.68388
			2	24.2671	22.2838	-1.98334	-1.429	2.6926						2	2.6926
			2	24.266	22.2849	-1.98114	-1.4268	2.6885						2	2.6885
			2	24.2433	22.9457	-1.29761	-0.743272	1.67397						2	1.67397
			2	24.3674	22.8216	-1.54581	-0.991472	1.98821						2	1.98821
			2	24.46	22.729	-1.73101	-1.17667	2.26055						2	2.26055
		LSE A FG	3	25.0913	21.639	-3.4523	-2.89796	7.45374	9.60006	0.7844			LSE A FG	3	7.45374
			3	25.1037	21.6266	-3.4771	-2.92276	7.58297						3	7.58297
			3	25.3155	21.4148	-3.90069	-3.34635	10.1707						3	10.1707
			3	24.3771	20.6281	-3.74896	-3.19462	9.15537						3	9.15537
			3	24.5012	20.504	-3.99716	-3.44282	10.8741						3	10.8741
			3	24.5938	20.4114	-4.18236	-3.62802	12.3635						3	12.3635
		LSE C FG	4	24.147	20.7682	-3.37879	-2.82445	7.08342	8.05883	0.252257			LSE C FG	4	7.08342
			4	24.2084	20.7067	-3.50165	-2.94731	7.71307						4	7.71307
			4	24.3127	20.6024	-3.71028	-3.15594	8.91316						4	8.91316
			4	24.4995	20.931	-3.56851	-3.01417	8.07896						4	8.07896
			4	24.5119	20.9186	-3.59331	-3.03897	8.21903						4	8.21903
			4	24.5229	20.9076	-3.61531	-3.06097	8.34533						4	8.34533
		100 PPM Chitosan FG	5	25.0811	21.3445	-3.73658	-3.18224	9.07715	8.80038	1.08153			100 PPM Chitosan FG	5	9.07715
			5	25.2464	21.1793	-4.06714	-3.5128	11.4145						5	11.4145
			5	25.2998	21.1259	-4.17385	-3.61951	12.2908						5	12.2908
			5	24.7196	21.7277	-2.99194	-2.4376	5.41739						5	5.41739
			5	24.9515	21.4958	-3.45573	-2.90139	7.47147						5	7.47147
			5	24.9179	21.5295	-3.38843	-2.83409	7.13093						5	7.13093
		LSE A+Chitosan FG	6	24.5171	21.1605	-3.35661	-2.80227	6.97539	8.7863	0.442993			LSE A+Chitosan FG	6	6.97539
			6	24.749	20.9286	-3.82041	-3.26607	9.6202						6	9.6202
			6	24.7153	20.9622	-3.75311	-3.19877	9.18173						6	9.18173
			6	24.7799	21.1478	-3.63212	-3.07778	8.44314						6	8.44314
			6	24.9039	21.0238	-3.88012	-3.32578	10.0267						6	10.0267
			6	24.7823	21.1455	-3.6368	-3.08246	8.47058						6	8.47058
		LSE C+Chitosan FG	7	24.8539	22.0459	-2.80802	-2.25368	4.76899	4.79531	0.39715			LSE C+Chitosan FG	7	4.76899
			7	24.8663	22.0335	-2.83282	-2.27848	4.85167						7	4.85167
			7	25.0781	21.8217	-3.25641	-2.70207	6.50734						7	6.50734
			7	25.7136	23.3219	-2.39172	-1.83738	3.5736						7	3.5736
			7	25.8377	23.1978	-2.63992	-2.08558	4.24445						7	4.24445
			7	25.9303	23.1052	-2.82512	-2.27078	4.82584						7	4.82584
				0	0	0	0.554341	0.680968							0.680968
	48 hrs post Fusarium application	control FG	8	25.4098	22.0489	-3.36087	-2.80653	6.99599	5.29429	1.54854			control FG	8	6.99599
			8	25.663	21.7957	-3.86725	-3.31291	9.93766						8	9.93766
			8	25.5896	21.8691	-3.72052	-3.16618	8.97665						8	8.97665
			8	24.4249	23.2296	-1.19532	-0.640977	1.55939						8	1.55939
			8	24.5489	23.1056	-1.44332	-0.888977	1.85186						8	1.85186
			8	24.7491	22.9054	-1.8437	-1.28936	2.4442						8	2.4442
		LSE A FG	9	25.4796	22.1874	-3.29224	-2.7379	6.67099	9.1268	0.60675			LSE A FG	9	6.67099
			9	25.8038	21.8632	-3.94063	-3.38629	10.4562						9	10.4562
			9	25.7038	21.9632	-3.74063	-3.18629	9.10264						9	9.10264
			9	25.632	22.0385	-3.59349	-3.03915	8.22005						9	8.22005
			9	25.7562	21.9144	-3.84176	-3.28742	9.76364						9	9.76364
			9	25.8118	21.8587	-3.95314	-3.3988	10.5473						9	10.5473
		LSE C FG	10	24.5907	20.5585	-4.03219	-3.47785	11.1413	13.9364	1.01566			LSE C FG	10	11.1413
			10	24.8439	20.3053	-4.53857	-3.98422	15.826						10	15.826
			10	24.7705	20.3787	-4.39184	-3.83749	14.2956						10	14.2956
			10	24.9852	21.0127	-3.97253	-3.41819	10.69						10	10.69
			10	25.2252	20.7727	-4.45253	-3.89819	14.9098						10	14.9098
			10	25.3094	20.6885	-4.62092	-4.06658	16.7557						10	16.7557
		100 PPM Chitosan FG	11	25.547	22.9465	-2.60053	-2.04619	4.13015	11.7694	3.13532			100 PPM Chitosan FG	11	4.13015
			11	25.7394	22.754	-2.9854	-2.43106	5.39291						11	5.39291
			11	25.8694	22.6241	-3.24537	-2.69103	6.45775						11	6.45775
			11	26.2996	22.0057	-4.29386	-3.73952	13.3569						11	13.3569
			11	26.541	21.7644	-4.77657	-4.22223	18.6645						11	18.6645
			11	26.6794	21.6259	-5.05351	-4.49917	22.6143						11	22.6143
		LSE A+Chitosan FG	12	25.1364	20.6751	-4.46126	-3.90692	15.0003	13.8907	1.74959			LSE A+Chitosan FG	12	15.0003
			12	25.2605	20.551	-4.70953	-4.15519	17.8171						12	17.8171
			12	25.3162	20.4953	-4.82091	-4.26657	19.2471						12	19.2471
			12	24.504	20.9589	-3.54512	-2.99078	7.94903						12	7.94903
			12	24.7293	20.7336	-3.99576	-3.44142	10.8635						12	10.8635
			12	24.8286	20.6343	-4.19439	-3.64004	12.467						12	12.467
		LSE C+Chitosan FG	13	24.7599	21.6801	-3.07983	-2.52549	5.75769	12.6506	2.86017			LSE C+Chitosan FG	13	5.75769
			13	24.8853	21.5548	-3.33047	-2.77613	6.85012						13	6.85012
			13	24.9579	21.4821	-3.4758	-2.92146	7.5761						13	7.5761
			13	24.8738	20.5001	-4.37365	-3.81931	14.1165						13	14.1165
			13	25.1978	20.1761	-5.02165	-4.46731	22.1204						13	22.1204
			13	25.1062	20.2677	-4.83849	-4.28415	19.483						13	19.483
				0	0	0	0.554341	0.680968							0.680968
	72 hrs post Fusarium application	control FG	14	24.5615	23.722	-0.839499	-0.285157	1.21854	2.45542	0.390355			control FG	14	1.21854
			14	24.8934	23.3901	-1.50329	-0.94895	1.93047						14	1.93047
			14	24.8813	23.4022	-1.47915	-0.924807	1.89843						14	1.89843
			14	25.3874	23.4749	-1.91251	-1.35817	2.56359						14	2.56359
			14	25.6274	23.2349	-2.39251	-1.83817	3.57555						14	3.57555
			14	25.6214	23.2409	-2.38051	-1.82617	3.54594						14	3.54594
		LSE A FG	15	24.9154	24.0971	-0.818341	-0.264	1.2008	1.04768	0.214224			LSE A FG	15	1.2008
			15	25.1568	23.8557	-1.30105	-0.746712	1.67796						15	1.67796
			15	25.1334	23.8791	-1.25431	-0.699965	1.62447						15	1.62447
			15	24.0131	24.3809	0.367804	0.922145	0.527724						15	0.527724
			15	24.1384	24.2555	0.117166	0.671507	0.627851						15	0.627851
			15	24.1377	24.2562	0.118538	0.672879	0.627253						15	0.627253
		LSE C FG	16	24.9154	22.3496	-2.5658	-2.01146	4.0319	3.30391	0.804144			LSE C FG	16	4.0319
			16	25.1546	22.1105	-3.04412	-2.48978	5.61691						16	5.61691
			16	25.1311	22.134	-2.99709	-2.44275	5.43676						16	5.43676
			16	24.0131	22.9721	-1.04097	-0.486633	1.40117						16	1.40117
			16	24.1366	22.8485	-1.28806	-0.733715	1.66292						16	1.66292
			16	24.1413	22.8438	-1.29749	-0.743149	1.67382	3.72393	0.866248				16	1.67382
		100 PPM Chitosan FG	17	24.8653	22.2218	-2.64354	-2.0892	4.25512					100 PPM Chitosan FG	17	4.25512
			17	25.0828	22.0044	-3.07837	-2.52403	5.75186						17	5.75186
			17	25.1781	21.909	-3.26914	-2.7148	6.56501						17	6.56501
			17	29.885	28.5573	-1.32772	-0.773381	1.70927						17	1.70927
			17	30.1264	28.3159	-1.81043	-1.25609	2.38848						17	2.38848
			17	30.1648	28.2775	-1.88737	-1.33303	2.51931						17	2.51931
		LSE A+Chitosan FG	18	25.547	24.722	-0.824997	-0.270656	1.20636	3.77935	1.10463			LSE A+Chitosan FG	18	1.20636
			18	25.6493	24.6198	-1.02948	-0.475139	1.39005						18	1.39005
			18	25.7572	24.5118	-1.24543	-0.691092	1.6145						18	1.6145
			18	26.2996	23.4749	-2.82467	-2.27033	4.82433						18	4.82433
			18	26.5528	23.2217	-3.33105	-2.77671	6.85287						18	6.85287
			18	26.5459	23.2286	-3.31732	-2.76298	6.78797						18	6.78797
		LSE C+Chitosan FG	19	25.1364	24.0734	-1.06302	-0.508678	1.42275	1.34236	0.205646			LSE C+Chitosan FG	19	1.42275
			19	25.3718	23.838	-1.53384	-0.9795	1.97178						19	1.97178
			19	25.339	23.8708	-1.46818	-0.913837	1.88405						19	1.88405
			19	24.504	24.3809	-0.123158	0.431184	0.741653						19	0.741653
			19	24.7282	24.1567	-0.571506	-0.0171647	1.01197						19	1.01197
			19	24.7353	24.1496	-0.585717	-0.0313761	1.02199						19	1.02199
				average	SEM
		24 hrs	control:T20	0.969691	0.0412245
			control:Fg	2.33129	0.176753
			100 PPM Chitosan:Fg	9.60006	0.7844
			LSE 5ml/L: Fg	8.05883	0.252257
			LSE 15ml/L: Fg	8.80038	1.08153
			LSE 5ml/L+Chitosan:Fg	8.7863	0.442993
			LSE 15ml/L+Chitosan:Fg	4.79531	0.39715
		48 hrs	control:Fg	5.29429	1.54854
			100 PPM Chitosan:Fg	9.1268	0.60675
			LSE 5ml/L: Fg	13.9364	1.01566
			LSE 15ml/L: Fg	11.7694	3.13532
			LSE 5ml/L+Chitosan:Fg	13.8907	1.74959
			LSE 15ml/L+Chitosan:Fg	12.6506	2.86017
		72 hrs	control:Fg	2.45542	0.390355
			100 PPM Chitosan:Fg	1.04768	0.214224
			LSE 5ml/L: Fg	3.30391	0.804144
			LSE 15ml/L: Fg	3.72393	0.866248
			LSE 5ml/L+Chitosan:Fg	3.77935	1.10463
			LSE 15ml/L+Chitosan:Fg	1.34236	0.205646

## Sheet: PR3 Gene expression
				GAPDH	PR3		dCT	ddct	2^-ddct	average	SEM
	24 hrs post Fusarium application	control T20	1	25.2537	32.774		7.52029	0.248225	0.841932	0.810541	0.0529691				control T20	1	0.841932
			1	25.3778	32.6499		7.27206	0	1							1	1
			1	25.477	32.8732		7.39617	0.124112	0.917568							1	0.917568
			1	24.3678	32.1531		7.78531	0.513244	0.700645							1	0.700645
			1	24.3691	32.1542		7.78517	0.513104	0.700713							1	0.700713
			1	24.3702	32.1519		7.78173	0.509664	0.702386							1	0.702386
		control FG	2	24.2648	29.1598		4.895	-2.37706	5.19479	5.1499	0.17913				control FG	2	5.19479
			2	24.2671	29.1587		4.89156	-2.3805	5.20719							2	5.20719
			2	24.266	29.1575		4.89142	-2.38064	5.20769							2	5.20769
			2	24.2433	29.2983		5.05501	-2.21705	4.64941							2	4.64941
			2	24.3674	29.3909		5.02351	-2.24855	4.75204							2	4.75204
			2	24.46	29.1742		4.71421	-2.55785	5.88828							2	5.88828
		LSE A FG	3	25.0913	29.4839		4.39261	-2.87945	7.35868	14.6646	3.31531				LSE A FG	3	7.35868
			3	25.1037	29.6957		4.59201	-2.68005	6.4088							3	6.4088
			3	25.3155	29.4715		4.15602	-3.11604	8.67004							3	8.67004
			3	24.3771	27.3321		2.95498	-4.31708	19.9329							3	19.9329
			3	24.5012	27.4247		2.92348	-4.34858	20.3729							3	20.3729
			3	24.5938	27.208		2.61418	-4.65788	25.2442							3	25.2442
		LSE C FG	4	24.147	27.7443		3.59736	-3.6747	12.7701	13.6752	0.384268				LSE C FG	4	12.7701
			4	24.2084	27.8486		3.64024	-3.63182	12.3961							4	12.3961
			4	24.3127	27.6829		3.37018	-3.90188	14.948							4	14.948
			4	24.4995	27.9788		3.47937	-3.79269	13.8585							4	13.8585
			4	24.5119	27.9898		3.47797	-3.79409	13.8719							4	13.8719
			4	24.5229	27.9664		3.44357	-3.82849	14.2066							4	14.2066
		100 PPM Chitosan FG	5	25.0811	29.0564		3.97527	-3.2968	9.8273	11.8809	0.720005				100 PPM Chitosan FG	5	9.8273
			5	25.2464	29.1097		3.86334	-3.40872	10.6201							5	10.6201
			5	25.2998	28.8911		3.59135	-3.68071	12.8234							5	12.8234
			5	24.7196	28.5708		3.85119	-3.42088	10.7099							5	10.7099
			5	24.9515	28.5372		3.58564	-3.68642	12.8743							5	12.8743
			5	24.9179	28.3389		3.42104	-3.85102	14.4302							5	14.4302
		LSE A+Chitosan FG	6	24.5171	29.1654		4.64834	-2.62372	6.16337	23.2031	7.17252				LSE A+Chitosan FG	6	6.16337
			6	24.749	29.1318		4.38279	-2.88927	7.40894							6	7.40894
			6	24.7153	28.9335		4.2182	-3.05386	8.30432							6	8.30432
			6	24.7799	26.8899		2.10993	-5.16213	35.8061							6	35.8061
			6	24.9039	26.7682		1.86427	-5.40779	42.453							6	42.453
			6	24.7823	26.7659		1.98359	-5.28847	39.0831							6	39.0831
		LSE C+Chitosan FG	7	24.8539	27.3101		2.45617	-4.81589	28.1661	33.4012	1.68715				LSE C+Chitosan FG	7	28.1661
			7	24.8663	27.0859		2.21958	-5.05248	33.1855							7	33.1855
			7	25.0781	27.0983		2.02019	-5.25187	38.1041							7	38.1041
			7	25.7136	28.1378		2.42419	-4.84787	28.7975							7	28.7975
			7	25.8377	27.9211		2.08339	-5.18867	36.4709							7	36.4709
			7	25.9303	28.0452		2.11489	-5.15717	35.6832							7	35.6832
							0	-7.27206	154.564								154.564
	48 hrs post Fusarium application	control FG	8	25.4098	28.0938		2.68403	-4.58803	24.0511	25.5345	2.21354				control FG	8	24.0511
			8	25.663	28.0204		2.35747	-4.91459	30.1605							8	30.1605
			8	25.5896	27.8406		2.25101	-5.02105	32.4702							8	32.4702
			8	24.4249	27.3692		2.94432	-4.32774	20.0808							8	20.0808
			8	24.5489	27.5694		3.02051	-4.25155	19.0478							8	19.0478
			8	24.7491	27.2452		2.49613	-4.77594	27.3968							8	27.3968
		LSE A FG	9	25.4796	27.5687		2.08907	-5.18299	36.3275	40.593	3.41496				LSE A FG	9	36.3275
			9	25.8038	27.4687		1.66488	-5.60718	48.745							9	48.745
			9	25.7038	27.2445		1.54069	-5.73137	53.127							9	53.127
			9	25.632	27.8976		2.26555	-5.00651	32.1447							9	32.1447
			9	25.7562	27.7734		2.01728	-5.25478	38.1809							9	38.1809
			9	25.8118	27.9533		2.14142	-5.13064	35.033							9	35.033
		LSE C FG	10	24.5907	28.1325		3.5418	-3.73026	13.2715	36.3432	9.64176				LSE C FG	10	13.2715
			10	24.8439	28.0591		3.21525	-4.05682	16.6427							10	16.6427
			10	24.7705	27.8793		3.10879	-4.16328	17.9172							10	17.9172
			10	24.9852	26.691		1.70577	-5.56629	47.3829							10	47.3829
			10	25.2252	26.7752		1.54996	-5.7221	52.7867							10	52.7867
			10	25.3094	26.451		1.14157	-6.13049	70.0584							10	70.0584
		100 PPM Chitosan FG	11	25.547	29.0226		3.47559	-3.79647	13.8948	29.7863	6.7756				100 PPM Chitosan FG	11	13.8948
			11	25.7394	28.8302		3.09072	-4.18134	18.143							11	18.143
			11	25.8694	29.1526		3.28315	-3.98891	15.8775							11	15.8775
			11	26.2996	28.3932		2.09363	-5.17843	36.2128							11	36.2128
			11	26.541	28.5317		1.99074	-5.28132	38.8897							11	38.8897
			11	26.6794	28.1519		1.47245	-5.79961	55.7002							11	55.7002
		LSE A+Chitosan FG	12	25.1364	27.4462		2.30981	-4.96225	31.1736	62.6119	13.3065				LSE A+Chitosan FG	12	31.1736
			12	25.2605	27.3221		2.06154	-5.21052	37.0275							12	37.0275
			12	25.3162	27.5019		2.18567	-5.08639	33.9747							12	33.9747
			12	24.504	25.5027		0.998674	-6.27339	77.3531							12	77.3531
			12	24.7293	25.2774		0.548037	-6.72402	105.714							12	105.714
			12	24.8286	25.602		0.773355	-6.49871	90.4285							12	90.4285
		LSE C+Chitosan FG	13	24.7599	25.1378		0.377881	-6.89418	118.947	115.39	2.9021				LSE C+Chitosan FG	13	118.947
			13	24.8853	25.3358		0.450544	-6.82152	113.105							13	113.105
			13	24.9579	25.2631		0.305217	-6.96684	125.092							13	125.092
			13	24.8738	25.3439		0.470106	-6.80195	111.582							13	111.582
			13	25.1978	25.5763		0.378525	-6.89354	118.894							13	118.894
			13	25.1062	25.6679		0.561687	-6.71037	104.719							13	104.719
							0	-7.27206	154.564								154.564
	72 hrs post Fusarium application	control FG	14	24.5615	31.8222		7.26066	-0.0113983	1.00793	2.06301	0.353516				control FG	14	1.00793
			14	24.8934	31.4903		6.59687	-0.675191	1.59681							14	1.59681
			14	24.8813	31.8101		6.92877	-0.343295	1.26865							14	1.26865
			14	25.3874	31.1562		5.76878	-1.50328	2.83487							14	2.83487
			14	25.6274	31.3902		5.76278	-1.50928	2.84669							14	2.84669
			14	25.6214	31.3962		5.77478	-1.49728	2.82311							14	2.82311
		LSE A FG	15	24.9154	29.8026		4.88718	-2.38488	5.22299	4.79865	0.191231				LSE A FG	15	5.22299
			15	25.1568	30.0206		4.86381	-2.40825	5.3083							15	5.3083
			15	25.1334	30.044		4.91056	-2.3615	5.13906							15	5.13906
			15	24.0131	29.1562		5.14316	-2.1289	4.37384							15	4.37384
			15	24.1384	29.2808		5.14247	-2.12959	4.37592							15	4.37592
			15	24.1377	29.2815		5.14385	-2.12821	4.37176							15	4.37176
		LSE C FG	16	24.9154	29.7602		4.84476	-2.4273	5.37887	3.67553	0.76231				LSE C FG	16	5.37887
			16	25.1546	29.9758		4.82124	-2.45082	5.46726							16	5.46726
			16	25.1311	29.9994		4.86827	-2.40379	5.29191							16	5.29191
			16	24.0131	30.3057		6.29262	-0.979441	1.9717							16	1.9717
			16	24.1366	30.4339		6.29734	-0.974724	1.96527							16	1.96527
			16	24.1413	30.4292		6.2879	-0.984158	1.97816							16	1.97816
		100 PPM Chitosan FG	17	24.8653	30.5405		5.67516	-1.5969	3.02492	24.4697	9.83566				100 PPM Chitosan FG	17	3.02492
			17	25.0828	30.8533		5.77055	-1.50151	2.8314							17	2.8314
			17	25.1781	30.7579		5.57978	-1.69228	3.23168							17	3.23168
			17	29.885	31.8938		2.00879	-5.26327	38.4063							17	38.4063
			17	30.1264	31.9323		1.8059	-5.46616	44.2057							17	44.2057
			17	30.1648	31.6524		1.48761	-5.78445	55.118							17	55.118
		LSE A+Chitosan FG	18	25.547	27.3796		1.8326	-5.43946	43.395	61.1776	7.35999				LSE A+Chitosan FG	18	43.395
			18	25.6493	27.2774		1.62812	-5.64394	50.0029							18	50.0029
			18	25.7572	27.4876		1.73036	-5.5417	46.5819							18	46.5819
			18	26.2996	27.5971		1.29747	-5.97459	62.8827							18	62.8827
			18	26.5528	27.5902		1.03742	-6.23464	75.3034							18	75.3034
			18	26.5459	27.3439		0.797955	-6.47411	88.8996							18	88.8996
		LSE C+Chitosan FG	19	25.1364	26.3732		1.23683	-6.03523	65.5822	54.2267	11.0375				LSE C+Chitosan FG	19	65.5822
			19	25.3718	26.3404		0.968586	-6.30347	78.9832							19	78.9832
			19	25.339	26.1378		0.798838	-6.47322	88.8453							19	88.8453
			19	24.504	27.0744		2.57042	-4.70164	26.0216							19	26.0216
			19	24.7282	27.0815		2.35335	-4.91871	30.2467							19	30.2467
			19	24.7353	26.8503		2.11497	-5.15709	35.6812							19	35.6812
							0
				average	SEM
		24 hrs	control:T20	0.810541	0.0529691
			control:Fg	5.1499	0.17913
			100 PPM Chitosan:Fg	14.6646	3.31531
			LSE 5ml/L: Fg	13.6752	0.384268
			LSE 15ml/L: Fg	11.8809	0.720005
			LSE 5ml/L+Chitosan:Fg	23.2031	7.17252
			LSE 15ml/L+Chitosan:Fg	33.4012	1.68715
		48 hrs	control:Fg	25.5345	2.21354
			100 PPM Chitosan:Fg	40.593	3.41496
			LSE 5ml/L: Fg	36.3432	9.64176
			LSE 15ml/L: Fg	29.7863	6.7756
			LSE 5ml/L+Chitosan:Fg	62.6119	13.3065
			LSE 15ml/L+Chitosan:Fg	115.39	2.9021
		72 hrs	control:Fg	2.06301	0.353516
			100 PPM Chitosan:Fg	4.79865	0.191231
			LSE 5ml/L: Fg	3.67553	0.76231
			LSE 15ml/L: Fg	24.4697	9.83566
			LSE 5ml/L+Chitosan:Fg	61.1776	7.35999
			LSE 15ml/L+Chitosan:Fg	54.2267	11.0375

## Sheet: PO activity
					Average	SEM
Control-T20:24 Hrs	0.0985	0.022	0.1085	0.0275	0.064125	0.0228522					Control-T20:24 Hrs	1	0.0985
Chitosan 100 PPM-T20:24 Hrs	0.423	0.234	0.3715	0.2395	0.317	0.0475232						1	0.022
LSE 5ml/L-T20:24 Hrs	0.338	0.167	0.278	0.1725	0.238875	0.0417614						1	0.1085
LSE 15ml/L-T20:24 Hrs	0.6735	0.496	0.321	0.5015	0.498	0.0719638						1	0.0275
LSE 5ml/L:Chi100-T20:24 Hrs	0.329	0.1425	0.2305	0.148	0.2125	0.0437383					Chitosan 100 PPM-T20:24 Hrs	2	0.423
LSE 15ml/L:Chi100-T20:24 Hrs	0.4165	0.2305	0.537	0.236	0.355	0.0744801						2	0.234
												2	0.3715
Control-Fg:24 Hrs	0.473	0.296	0.484	0.3015	0.388625	0.05195						2	0.2395
Chitosan 100 PPM-Fg:24 Hrs	0.504	0.6635	0.493	0.408	0.517125	0.0532981					LSE 5ml/L-T20:24 Hrs	3	0.338
LSE 5ml/L-Fg:24 Hrs	0.657	0.44	0.668	0.4455	0.552625	0.063486						3	0.167
LSE 15ml/L-Fg:24 Hrs	0.638	0.519	0.127	0.4635	0.436875	0.109517						3	0.278
LSE 5ml/L:Chi100-Fg:24 Hrs	0.657	0.3745	0.668	0.38	0.519875	0.0823828						3	0.1725
LSE 15ml/L:Chi100-Fg:24 Hrs	0.881	0.679	0.892	0.6845	0.784125	0.0591595					LSE 15ml/L-T20:24 Hrs	4	0.6735
												4	0.496
Control-T20:48 Hrs	0.102	0.0355	0.1075	0.041	0.0715	0.0192624						4	0.321
Chitosan 100 PPM-T20:48 Hrs	0.367	0.1925	0.3725	0.198	0.2825	0.0503988						4	0.5015
LSE 5ml/L-T20:48 Hrs	0.282	0.1255	0.2875	0.131	0.2065	0.0452055					LSE 5ml/L:Chi100-T20:24 Hrs	5	0.329
LSE 15ml/L-T20:48 Hrs	0.365	0.262	0.3705	0.2675	0.31625	0.0297759						5	0.1425
LSE 5ml/L:Chi100-T20:48 Hrs	0.237	0.065	0.2425	0.0705	0.15375	0.0496775						5	0.2305
LSE 15ml/L:Chi100-T20:48 Hrs	0.511	0.3695	0.5165	0.375	0.443	0.0408784						5	0.148
											LSE 15ml/L:Chi100-T20:24 Hrs	6	0.4165
Control-Fg:48 Hrs	0.377	0.2605	0.3825	0.266	0.3215	0.0336681						6	0.2305
Chitosan 100 PPM-Fg:48 Hrs	0.584	0.4095	0.5895	0.415	0.4995	0.0503988						6	0.537
LSE 5ml/L-Fg:48 Hrs	0.8405	0.684	0.846	0.6895	0.765	0.0452055						6	0.236
LSE 15ml/L-Fg:48 Hrs	0.5235	0.4205	0.529	0.426	0.47475	0.0297759					Control-Fg:24 Hrs	7	0.473
LSE 5ml/L:Chi100-Fg:48 Hrs	0.3105	0.0885	0.316	0.094	0.20225	0.0641055						7	0.296
LSE 15ml/L:Chi100-Fg:48 Hrs	0.3355	0.194	0.341	0.1995	0.2675	0.0408784						7	0.484
												7	0.3015
											Chitosan 100 PPM-Fg:24 Hrs	8	0.504
Control-T20:24 Hrs	0.064125	0.0228522										8	0.6635
Chitosan 100 PPM-T20:24 Hrs	0.317	0.0475232										8	0.493
LSE 5ml/L-T20:24 Hrs	0.238875	0.0417614										8	0.408
LSE 15ml/L-T20:24 Hrs	0.498	0.0719638									LSE 5ml/L-Fg:24 Hrs	9	0.657
LSE 5ml/L:Chi100-T20:24 Hrs	0.2125	0.0437383										9	0.44
LSE 15ml/L:Chi100-T20:24 Hrs	0.355	0.0744801										9	0.668
												9	0.4455
Control-Fg:24 Hrs	0.388625	0.05195									LSE 15ml/L-Fg:24 Hrs	10	0.638
Chitosan 100 PPM-Fg:24 Hrs	0.517125	0.0532981										10	0.519
LSE 5ml/L-Fg:24 Hrs	0.552625	0.063486										10	0.127
LSE 15ml/L-Fg:24 Hrs	0.436875	0.109517										10	0.4635
LSE 5ml/L:Chi100-Fg:24 Hrs	0.519875	0.0823828									LSE 5ml/L:Chi100-Fg:24 Hrs	11	0.657
LSE 15ml/L:Chi100-Fg:24 Hrs	0.784125	0.0591595										11	0.3745
												11	0.668
Control-T20:48 Hrs	0.0715	0.0192624										11	0.38
Chitosan 100 PPM-T20:48 Hrs	0.2825	0.0503988									LSE 15ml/L:Chi100-Fg:24 Hrs	12	0.881
LSE 5ml/L-T20:48 Hrs	0.2065	0.0452055										12	0.679
LSE 15ml/L-T20:48 Hrs	0.31625	0.0297759										12	0.892
LSE 5ml/L:Chi100-T20:48 Hrs	0.15375	0.0496775										12	0.6845
LSE 15ml/L:Chi100-T20:48 Hrs	0.443	0.0408784									Control-T20:48 Hrs	13	0.102
												13	0.0355
Control-Fg:48 Hrs	0.3215	0.0336681										13	0.1075
Chitosan 100 PPM-Fg:48 Hrs	0.4995	0.0503988										13	0.041
LSE 5ml/L-Fg:48 Hrs	0.765	0.0452055									Chitosan 100 PPM-T20:48 Hrs	14	0.367
LSE 15ml/L-Fg:48 Hrs	0.47475	0.0297759										14	0.1925
LSE 5ml/L:Chi100-Fg:48 Hrs	0.20225	0.0641055										14	0.3725
LSE 15ml/L:Chi100-Fg:48 Hrs	0.2675	0.0408784										14	0.198
											LSE 5ml/L-T20:48 Hrs	15	0.282
												15	0.1255
												15	0.2875
												15	0.131
											LSE 15ml/L-T20:48 Hrs	16	0.365
												16	0.262
												16	0.3705
												16	0.2675
											LSE 5ml/L:Chi100-T20:48 Hrs	17	0.237
												17	0.065
												17	0.2425
												17	0.0705
											LSE 15ml/L:Chi100-T20:48 Hrs	18	0.511
												18	0.3695
												18	0.5165
												18	0.375
											Control-Fg:48 Hrs	19	0.377
												19	0.2605
												19	0.3825
												19	0.266
											Chitosan 100 PPM-Fg:48 Hrs	20	0.584
												20	0.4095
												20	0.5895
												20	0.415
											LSE 5ml/L-Fg:48 Hrs	21	0.8405
												21	0.684
												21	0.846
												21	0.6895
											LSE 15ml/L-Fg:48 Hrs	22	0.5235
												22	0.4205
												22	0.529
												22	0.426
											LSE 5ml/L:Chi100-Fg:48 Hrs	23	0.3105
												23	0.0885
												23	0.316
												23	0.094
											LSE 15ml/L:Chi100-Fg:48 Hrs	24	0.3355
												24	0.194
												24	0.341
												24	0.1995

## Sheet: PPO activity
					Average	SEM				Control-T20:24 Hrs	1	0.1735
Control-T20:24 Hrs	0.1735	0.15	0.169	0.1455	0.1595	0.00690712					1	0.15
Chitosan 100 PPM-T20:24 Hrs	0.267	0.248	0.2625	0.2435	0.25525	0.00563656					1	0.169
LSE 5ml/L-T20:24 Hrs	0.146	0.0955	0.1415	0.091	0.1185	0.0146359					1	0.1455
LSE 15ml/L-T20:24 Hrs	0.375	0.2965	0.3705	0.292	0.3335	0.0226982				Chitosan 100 PPM-T20:24 Hrs	2	0.267
LSE 5ml/L:Chi100-T20:24 Hrs	0.267	0.24	0.2625	0.2355	0.25125	0.00790174					2	0.248
LSE 15ml/L:Chi100-T20:24 Hrs	0.1615	0.087	0.157	0.0825	0.122	0.0215455					2	0.2625
											2	0.2435
Control-Fg:24 Hrs	0.1775	0.154	0.173	0.1495	0.1635	0.00690712				LSE 5ml/L-T20:24 Hrs	3	0.146
Chitosan 100 PPM-Fg:24 Hrs	0.685	0.6265	0.6805	0.622	0.6535	0.0169374					3	0.0955
LSE 5ml/L-Fg:24 Hrs	0.385	0.3705	0.3805	0.366	0.3755	0.00438273					3	0.1415
LSE 15ml/L-Fg:24 Hrs	0.889	0.8655	0.8845	0.861	0.875	0.00690712					3	0.091
LSE 5ml/L:Chi100-Fg:24 Hrs	0.525	0.5465	0.5205	0.542	0.5335	0.006341				LSE 15ml/L-T20:24 Hrs	4	0.375
LSE 15ml/L:Chi100-Fg:24 Hrs	0.5275	0.504	0.523	0.4995	0.5135	0.00690712					4	0.2965
											4	0.3705
Control-T20:48 Hrs	0.086	0.0805	0.0815	0.076	0.081	0.00205142					4	0.292
Chitosan 100 PPM-T20:48 Hrs	0.3245	0.3295	0.32	0.325	0.32475	0.00194186				LSE 5ml/L:Chi100-T20:24 Hrs	5	0.267
LSE 5ml/L-T20:48 Hrs	0.2495	0.2045	0.245	0.2	0.22475	0.0130552					5	0.24
LSE 15ml/L-T20:48 Hrs	0.225	0.215	0.2205	0.2105	0.21775	0.00316557					5	0.2625
LSE 5ml/L:Chi100-T20:48 Hrs	0.177	0.182	0.1725	0.1775	0.17725	0.00194186					5	0.2355
LSE 15ml/L:Chi100-T20:48 Hrs	0.2995	0.3145	0.295	0.31	0.30475	0.00452079				LSE 15ml/L:Chi100-T20:24 Hrs	6	0.1615
											6	0.087
Control-Fg:48 Hrs	0.1935	0.155	0.189	0.1505	0.172	0.0111897					6	0.157
Chitosan 100 PPM-Fg:48 Hrs	0.358	0.3495	0.3535	0.345	0.3515	0.00277639					6	0.0825
LSE 5ml/L-Fg:48 Hrs	0.2515	0.273	0.247	0.2685	0.26	0.006341				Control-Fg:24 Hrs	7	0.1775
LSE 15ml/L-Fg:48 Hrs	0.566	0.5275	0.5615	0.523	0.5445	0.0111897					7	0.154
LSE 5ml/L:Chi100-Fg:48 Hrs	0.339	0.3155	0.3345	0.311	0.325	0.00690712					7	0.173
LSE 15ml/L:Chi100-Fg:48 Hrs	0.462	0.4285	0.4575	0.424	0.443	0.00975748					7	0.1495
										Chitosan 100 PPM-Fg:24 Hrs	8	0.685
											8	0.6265
											8	0.6805
											8	0.622
										LSE 5ml/L-Fg:24 Hrs	9	0.385
											9	0.3705
											9	0.3805
											9	0.366
										LSE 15ml/L-Fg:24 Hrs	10	0.889
	0.1595	0.00690712									10	0.8655
	0.25525	0.00563656									10	0.8845
	0.1185	0.0146359									10	0.861
	0.3335	0.0226982								LSE 5ml/L:Chi100-Fg:24 Hrs	11	0.525
	0.25125	0.00790174									11	0.5465
	0.122	0.0215455									11	0.5205
											11	0.542
	0.1635	0.00690712								LSE 15ml/L:Chi100-Fg:24 Hrs	12	0.5275
	0.6535	0.0169374									12	0.504
	0.3755	0.00438273									12	0.523
	0.875	0.0690712									12	0.4995
	0.5335	0.006341								Control-T20:48 Hrs	13	0.086
	0.5135	0.00690712									13	0.0805
											13	0.0815
	0.081	0.0205142									13	0.076
	0.32475	0.0194186								Chitosan 100 PPM-T20:48 Hrs	14	0.3245
	0.22475	0.0130552									14	0.3295
	0.21775	0.0316557									14	0.32
	0.17725	0.00194186									14	0.325
	0.30475	0.00452079								LSE 5ml/L-T20:48 Hrs	15	0.2495
											15	0.2045
	0.172	0.0111897									15	0.245
	0.3515	0.00277639									15	0.2
	0.26	0.006341								LSE 15ml/L-T20:48 Hrs	16	0.225
	0.5445	0.0411897									16	0.215
	0.325	0.00690712									16	0.2205
	0.443	0.00975748									16	0.2105
										LSE 5ml/L:Chi100-T20:48 Hrs	17	0.177
											17	0.182
											17	0.1725
											17	0.1775
										LSE 15ml/L:Chi100-T20:48 Hrs	18	0.2995
											18	0.3145
											18	0.295
											18	0.31
										Control-Fg:48 Hrs	19	0.1935
											19	0.155
											19	0.189
											19	0.1505
										Chitosan 100 PPM-Fg:48 Hrs	20	0.358
											20	0.3495
											20	0.3535
											20	0.345
										LSE 5ml/L-Fg:48 Hrs	21	0.2515
											21	0.273
											21	0.247
											21	0.2685
										LSE 15ml/L-Fg:48 Hrs	22	0.566
											22	0.5275
											22	0.5615
											22	0.523
										LSE 5ml/L:Chi100-Fg:48 Hrs	23	0.339
											23	0.3155
											23	0.3345
											23	0.311
										LSE 15ml/L:Chi100-Fg:48 Hrs	24	0.462
											24	0.4285
											24	0.4575
											24	0.424

## Sheet: PAL activity
					Average	SEM			Control-T20:24 Hrs	1	0.091
Control-T20:24 Hrs	0.091	0.084	0.078	0.071	0.081	0.00426224				1	0.084
Chitosan 100 PPM-T20:24 Hrs	0.29	0.281	0.277	0.268	0.279	0.00456435				1	0.078
LSE 5ml/L-T20:24 Hrs	0.214	0.207	0.201	0.194	0.204	0.00426224				1	0.071
LSE 15ml/L-T20:24 Hrs	0.228	0.271	0.215	0.258	0.243	0.0129679			Chitosan 100 PPM-T20:24 Hrs	2	0.29
LSE 5ml/L:Chi100-T20:24 Hrs	0.221	0.214	0.208	0.201	0.211	0.00426224				2	0.281
LSE 15ml/L:Chi100-T20:24 Hrs	0.147	0.136	0.134	0.123	0.135	0.00491596				2	0.277
										2	0.268
Control-Fg:24 Hrs	0.193	0.182	0.18	0.169	0.181	0.00491596			LSE 5ml/L-T20:24 Hrs	3	0.214
Chitosan 100 PPM-Fg:24 Hrs	0.468	0.463	0.455	0.45	0.459	0.00402078				3	0.207
LSE 5ml/L-Fg:24 Hrs	0.551	0.523	0.538	0.51	0.5305	0.0089116				3	0.201
LSE 15ml/L-Fg:24 Hrs	0.668	0.619	0.655	0.606	0.637	0.0146344				3	0.194
LSE 5ml/L:Chi100-Fg:24 Hrs	0.655	0.638	0.642	0.625	0.64	0.00617792			LSE 15ml/L-T20:24 Hrs	4	0.228
LSE 15ml/L:Chi100-Fg:24 Hrs	0.249	0.211	0.236	0.198	0.2235	0.0115938				4	0.271
										4	0.215
Control-T20:48 Hrs	0.019	0.069	0.006	0.056	0.0375	0.0149136				4	0.258
Chitosan 100 PPM-T20:48 Hrs	0.264	0.242	0.251	0.229	0.2465	0.00737677			LSE 5ml/L:Chi100-T20:24 Hrs	5	0.221
LSE 5ml/L-T20:48 Hrs	0.151	0.216	0.138	0.203	0.177	0.0191355				5	0.214
LSE 15ml/L-T20:48 Hrs	0.138	0.231	0.125	0.218	0.178	0.0271078				5	0.208
LSE 5ml/L:Chi100-T20:48 Hrs	0.185	0.176	0.172	0.163	0.174	0.00456435				5	0.201
LSE 15ml/L:Chi100-T20:48 Hrs	0.151	0.122	0.138	0.109	0.13	0.00917424			LSE 15ml/L:Chi100-T20:24 Hrs	6	0.147
										6	0.136
Control-Fg:48 Hrs	0.065	0.119	0.052	0.106	0.0855	0.0160338				6	0.134
Chitosan 100 PPM-Fg:48 Hrs	0.217	0.215	0.204	0.202	0.2095	0.00379693				6	0.123
LSE 5ml/L-Fg:48 Hrs	0.215	0.226	0.202	0.213	0.214	0.00491596			Control-Fg:24 Hrs	7	0.193
LSE 15ml/L-Fg:48 Hrs	0.241	0.214	0.228	0.201	0.221	0.00865063				7	0.182
LSE 5ml/L:Chi100-Fg:48 Hrs	0.341	0.359	0.328	0.346	0.3435	0.00640963				7	0.18
LSE 15ml/L:Chi100-Fg:48 Hrs	0.249	0.239	0.236	0.226	0.2375	0.00473462				7	0.169
									Chitosan 100 PPM-Fg:24 Hrs	8	0.468
										8	0.463
										8	0.455
										8	0.45
									LSE 5ml/L-Fg:24 Hrs	9	0.551
										9	0.523
										9	0.538
										9	0.51
									LSE 15ml/L-Fg:24 Hrs	10	0.668
										10	0.619
										10	0.655
										10	0.606
									LSE 5ml/L:Chi100-Fg:24 Hrs	11	0.655
										11	0.638
										11	0.642
										11	0.625
									LSE 15ml/L:Chi100-Fg:24 Hrs	12	0.249
										12	0.211
										12	0.236
										12	0.198
									Control-T20:48 Hrs	13	0.019
										13	0.069
										13	0.006
										13	0.056
									Chitosan 100 PPM-T20:48 Hrs	14	0.264
										14	0.242
										14	0.251
										14	0.229
									LSE 5ml/L-T20:48 Hrs	15	0.151
										15	0.216
										15	0.138
										15	0.203
									LSE 15ml/L-T20:48 Hrs	16	0.138
										16	0.231
										16	0.125
										16	0.218
									LSE 5ml/L:Chi100-T20:48 Hrs	17	0.185
										17	0.176
										17	0.172
										17	0.163
									LSE 15ml/L:Chi100-T20:48 Hrs	18	0.151
										18	0.122
										18	0.138
										18	0.109
									Control-Fg:48 Hrs	19	0.065
										19	0.119
										19	0.052
										19	0.106
									Chitosan 100 PPM-Fg:48 Hrs	20	0.217
										20	0.215
										20	0.204
										20	0.202
									LSE 5ml/L-Fg:48 Hrs	21	0.215
										21	0.226
										21	0.202
										21	0.213
									LSE 15ml/L-Fg:48 Hrs	22	0.241
										22	0.214
										22	0.228
										22	0.201
									LSE 5ml/L:Chi100-Fg:48 Hrs	23	0.341
										23	0.359
										23	0.328
										23	0.346
									LSE 15ml/L:Chi100-Fg:48 Hrs	24	0.249
										24	0.239
										24	0.236
										24	0.226

## Sheet: FHB
		Control					Control:Ac					ANE 5ml/L+100 PPM chitosan					ANE 15ml/L+100 PPM chitosan						ANE 5ml/L					ANE 15ml/L						Chitosan100 PPM
Control		Total spikes	10 days				Total spikes	10 days				Total spikes	10 days		ANE:C+100Chi		Total spikes	10 days					Total spikes	10 days				Total spikes	10 days					Total spikes	10 days
	1	17	11			1	15	12			1	17	4			1	17	9				1	16	11			1	17	12				1	17	10
	2	15	10			2	16	12			2	16	6			2	16	6				2	17	10			2	17	13				2	18	14
	3	17	13			3	15	11			3	15	5			3	16	9				3	19	9			3	15	10				3	18	10
	4	17	14		Control	4	16	10			4	16	6			4	16	7				4	17	10			4	17	11				4	16	14
	5	18	12			5	15	11			5	17	8			5	17	8				5	17	11			5	17	13				5	17	10
	6	19	13			6	16	10			6	17	6			6	17	7				6	15	11			6	17	14				6	17	14
	7	16	14			7	16	12			7	16	4			7	16	7				7	15	9			7	17	12				7	17	10
	8	17	14			8	18	10			8	18	6			8	15	8				8	17	12			8	18	16				8	19	12
	9	20	15			9	15	10			9	17	5			9	16	9				9	19	9			9	17	13				9	15	14
	10	15	12			10	16	12			10	16	6			10	16	6				10	17	10			10	15	10				10	16	10
	11	17	14			11	15	11			11	15	6			11	17	7				11	17	11			11	17	11				11	19	13
	12	16	13			12	16	10			12	16	4			12	17	7				12	15	11			12	17	13				12	15	10
	13	18	15			13	16	12			13	17	6			13	17	8				13	17	11			13	17	14				13	20	14
	14	20	16			14	18	10			14	17	4			14	17	10				14	15	11			14	17	12				14	19	13
	15	19	12			15	18	11			15	16	8			15	16	10				15	15	9			15	18	16				15	17	10
	16	20	16			16	15	12			16	18	6			16	15	9				16	17	12			16	17	13				16	16	12
	17	17	15			17	16	11			17	17	7			17	16	10				17	19	9			17	17	13				17	17	14
	18	16	13			18	15	10			18	18	6			18	16	9				18	17	10			18	17	14				18	15	12
	19	18	16			19	16	12			19	17	4			19	15	6				19	16	11			19	17	12				19	16	10
	20	20	12			20	15	10			20	16	7			20	16	7				20	17	10			20	18	16				20	20	11
	21	20	11			21	16	11			21	15	6			21	16	8				21	19	9			21	18	16				21	19	11
		Average	13.381				Average	10.9524				Average	5.71429				Average	7.95238					Average	10.2857				Average	13.0476					Average	11.75
		SEM	0.380952				SEM	0.188682				SEM	0.268531				SEM	0.288479					SEM	0.219771				SEM	0.405182					SEM	0.700765
		Control	1	11
			1	10
			1	13			Control	13.381	0.380952
			1	14			Chi 100 PPM chitosan	11.75	0.700765
			1	12			LSE 5ml/L	10.2857	0.219771
			1	13			LSE 15ml/L	13.0476	0.405182
			1	14			LSE 5ml/L+Chi 100 PPM chitosan	5.71429	0.268531
			1	14			LSE 15ml/L+Chi 100 PPM chitosan	7.95238	0.288479
			1	15
			1	12
			1	14
			1	13
			1	15
			1	16
			1	12
			1	16
			1	15
			1	13
			1	16
			1	12
			1	11
		Chitosan100 PPM	2	10
			2	14
			2	10
			2	14
			2	10
			2	14
			2	10
			2	12
			2	14
			2	10
			2	13
			2	10
			2	14
			2	13
			2	10
			2	12
			2	14
			2	12
			2	10
			2	11
			2	11
		LSE 5ml/L	3	11
			3	10
			3	9
			3	10
			3	11
			3	11
			3	9
			3	12
			3	9
			3	10
			3	11
			3	11
			3	11
			3	11
			3	9
			3	12
			3	9
			3	10
			3	11
			3	10
			3	9
		LSE 15ml/L	4	12
			4	13
			4	10
			4	11
			4	13
			4	14
			4	12
			4	16
			4	13
			4	10
			4	11
			4	13
			4	14
			4	12
			4	16
			4	13
			4	13
			4	14
			4	12
			4	16
			4	16
		LSE 5ml/L+100 PPM chitosan	5	4
			5	6
			5	5
			5	6
			5	8
			5	6
			5	4
			5	6
			5	5
			5	6
			5	6
			5	4
			5	6
			5	4
			5	8
			5	6
			5	7
			5	6
			5	4
			5	7
			5	6
		LSE 15ml/L+100 PPM chitosan	6	9
			6	6
			6	9
			6	7
			6	8
			6	7
			6	7
			6	8
			6	9
			6	6
			6	7
			6	7
			6	8
			6	10
			6	10
			6	9
			6	10
			6	9
			6	6
			6	7
			6	8

[truncated: 1 more sheets: Mycotoxin analysis]
